# Supplementary material
Source: publisher site journal article supplement (https://www.dovepress.com/get_supplementary_file.php?f=488901.docx)
Supplement: Supplementary file 1 [file get_supplementary_file.php]

Supplementary Table 1. Primers sequence for qRT-PCR of chemokines.

| Genes | Forward primers | Reverse primers |
| --- | --- | --- |
| CCL2 | 5’-AGGTGTCCCAAAGAAGCTGT-3’ | 5’-ACGGGTCAACTTCACATTCA-3’ |
| CCL5 | 5’-CCTGCTGCTTTGCCTACCTCTC-3’ | 5’-ACACACTTGGCGGTTCCTTCGA-3’ |
| TBP | 5’-CTACCGTGAATCTTGGCTGTAAAC-3’ | 5’-AATCAACGCAGTTGTCCGTGGC-3’ |

CCL2, chemokine (C-C motif) ligand 2; CCL5, chemokine (C-C motif) ligand 5; TBP, TATA box binding protein.


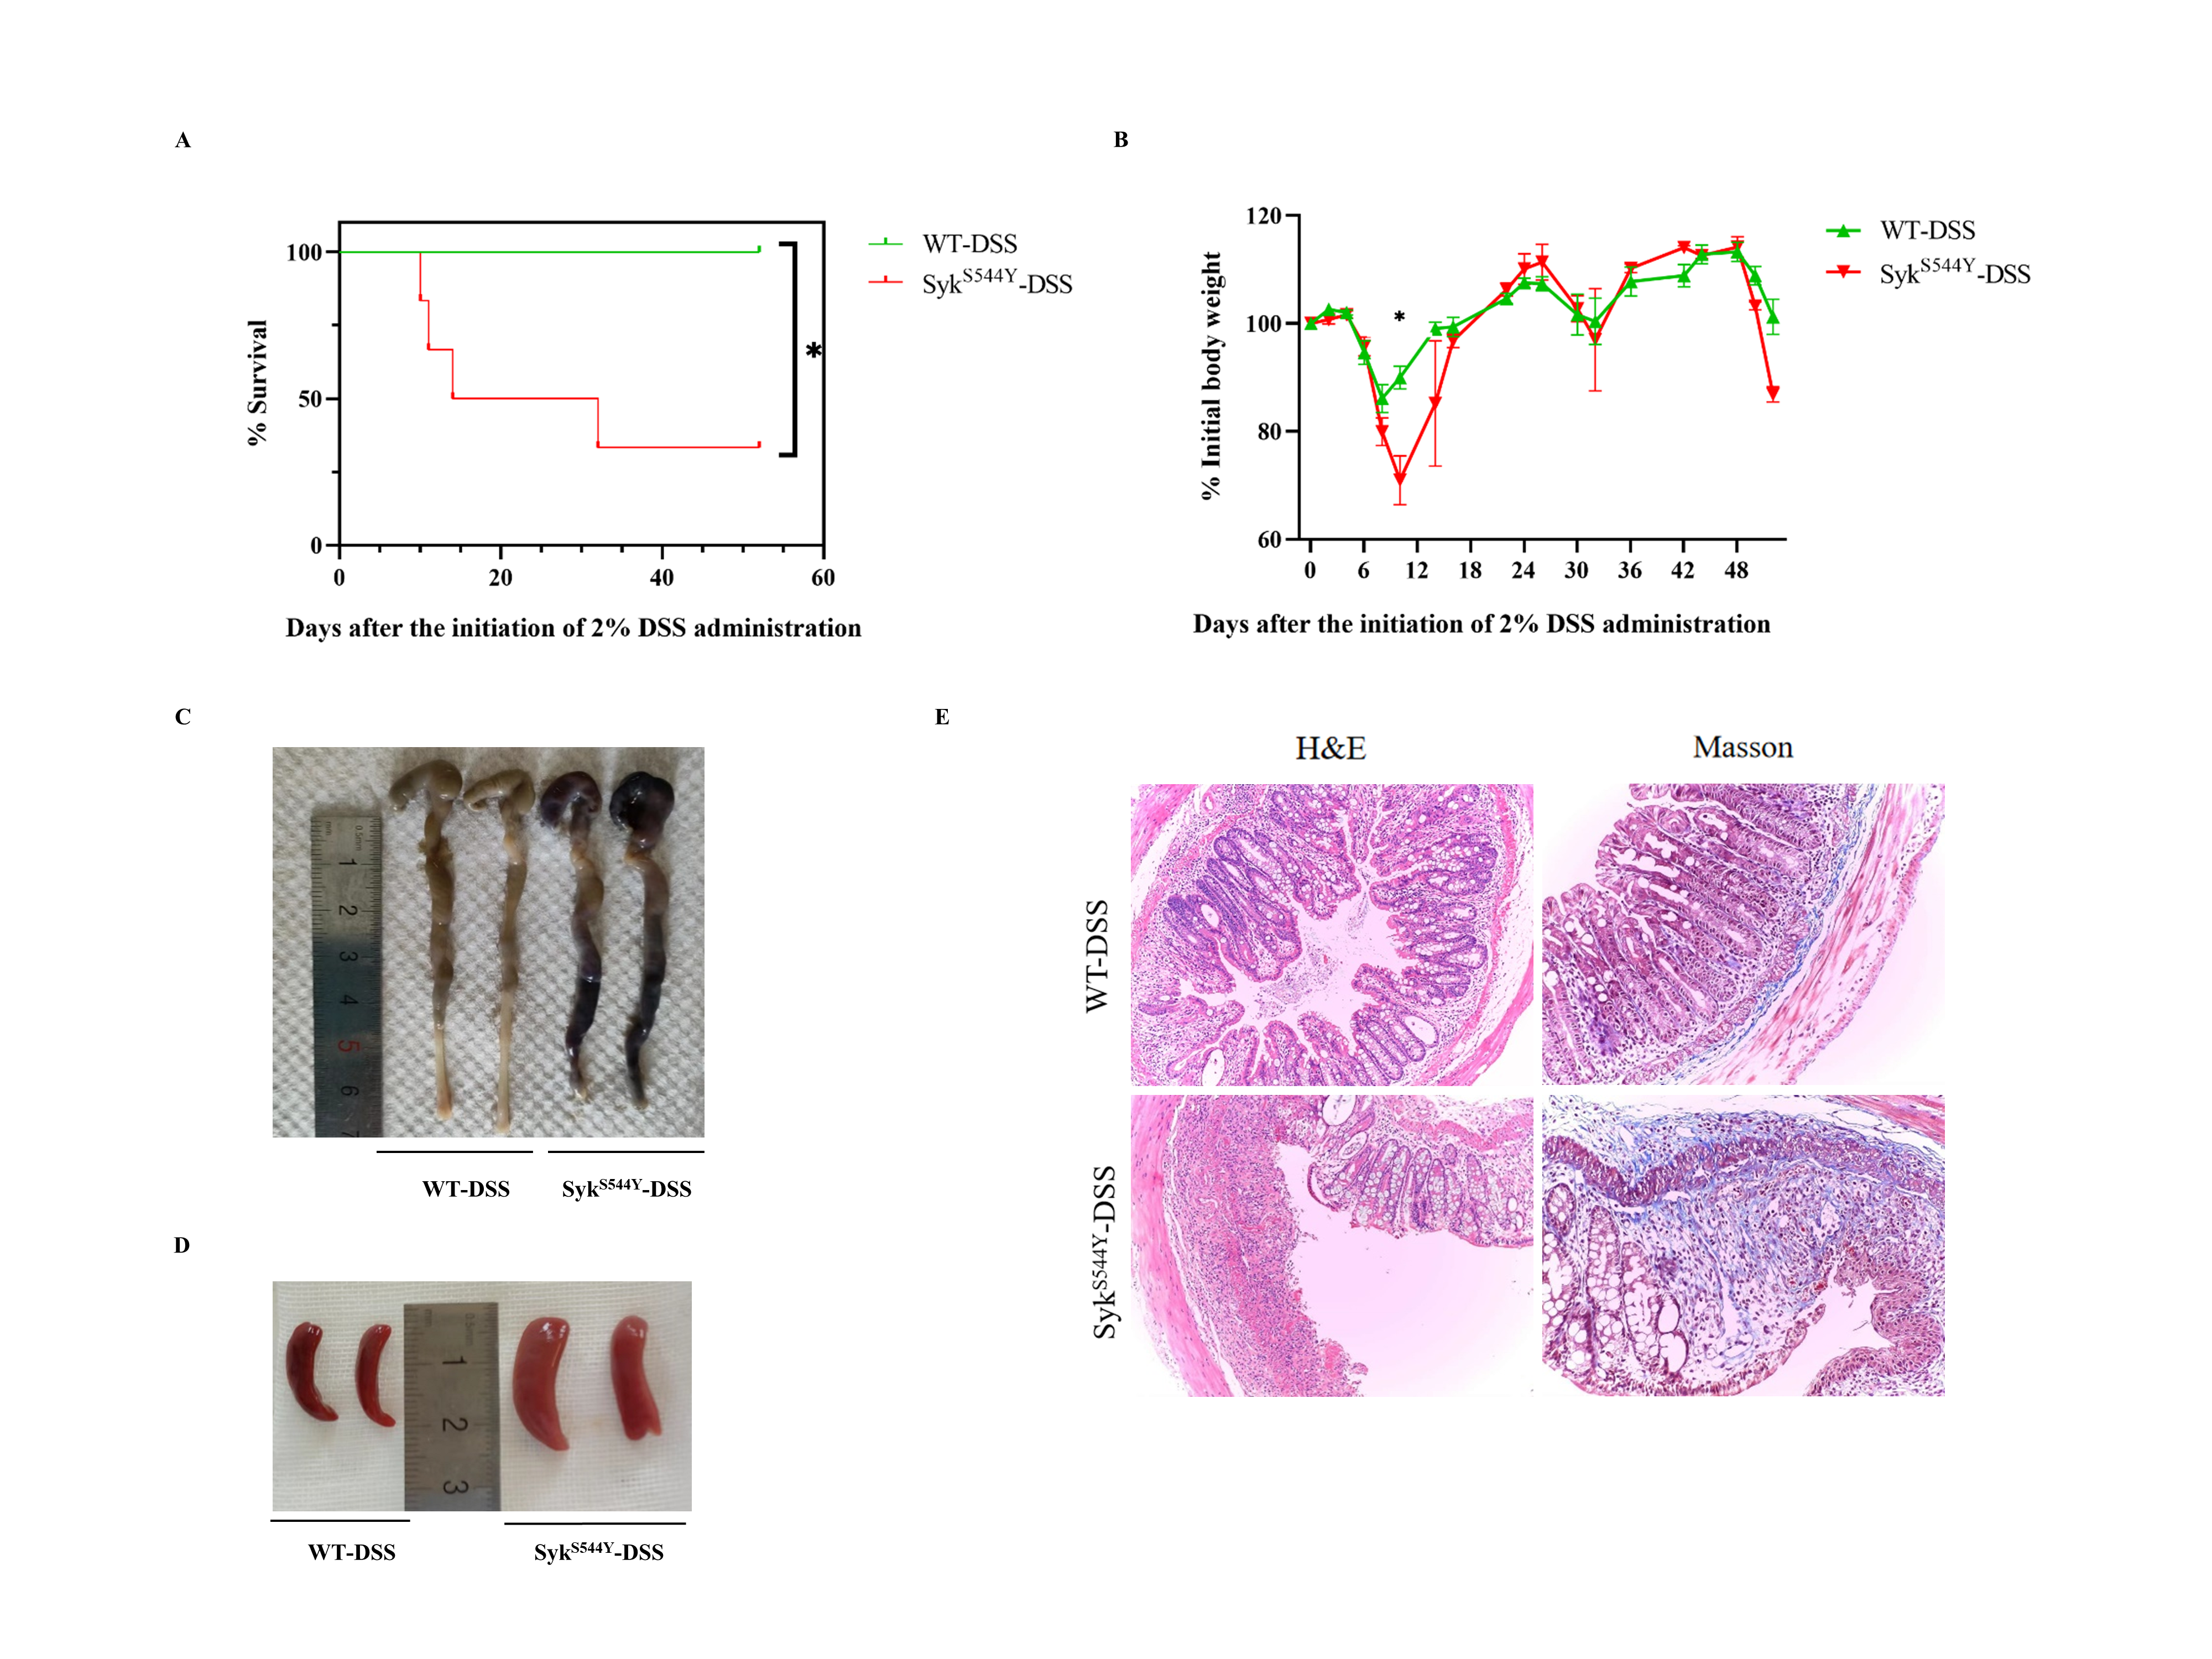


**Supplementary Figure 1** SykS544Y mice were susceptible to DSS-induced chronic colitis. WT and SykS544Y mice (n=6/group) were treated with three cycles of 2% DSS (7d of DSS induction as described and 14d of water). The colitis was evaluated by (A) survival curve, and (B) body weight loss, expressed as a percentage of the initial body weight. (C, D) Representative images of colon and spleen in different groups after induction. (E) Representative images of mucosal inflammation analyzed with colon sections stained with H&E and Masson’s trichrome. Scale bar: 200μm. Data are shown as mean values ± SEM; **P* < 0.05. DSS, dextran sodium sulphate; SEM, standard error of the mean.


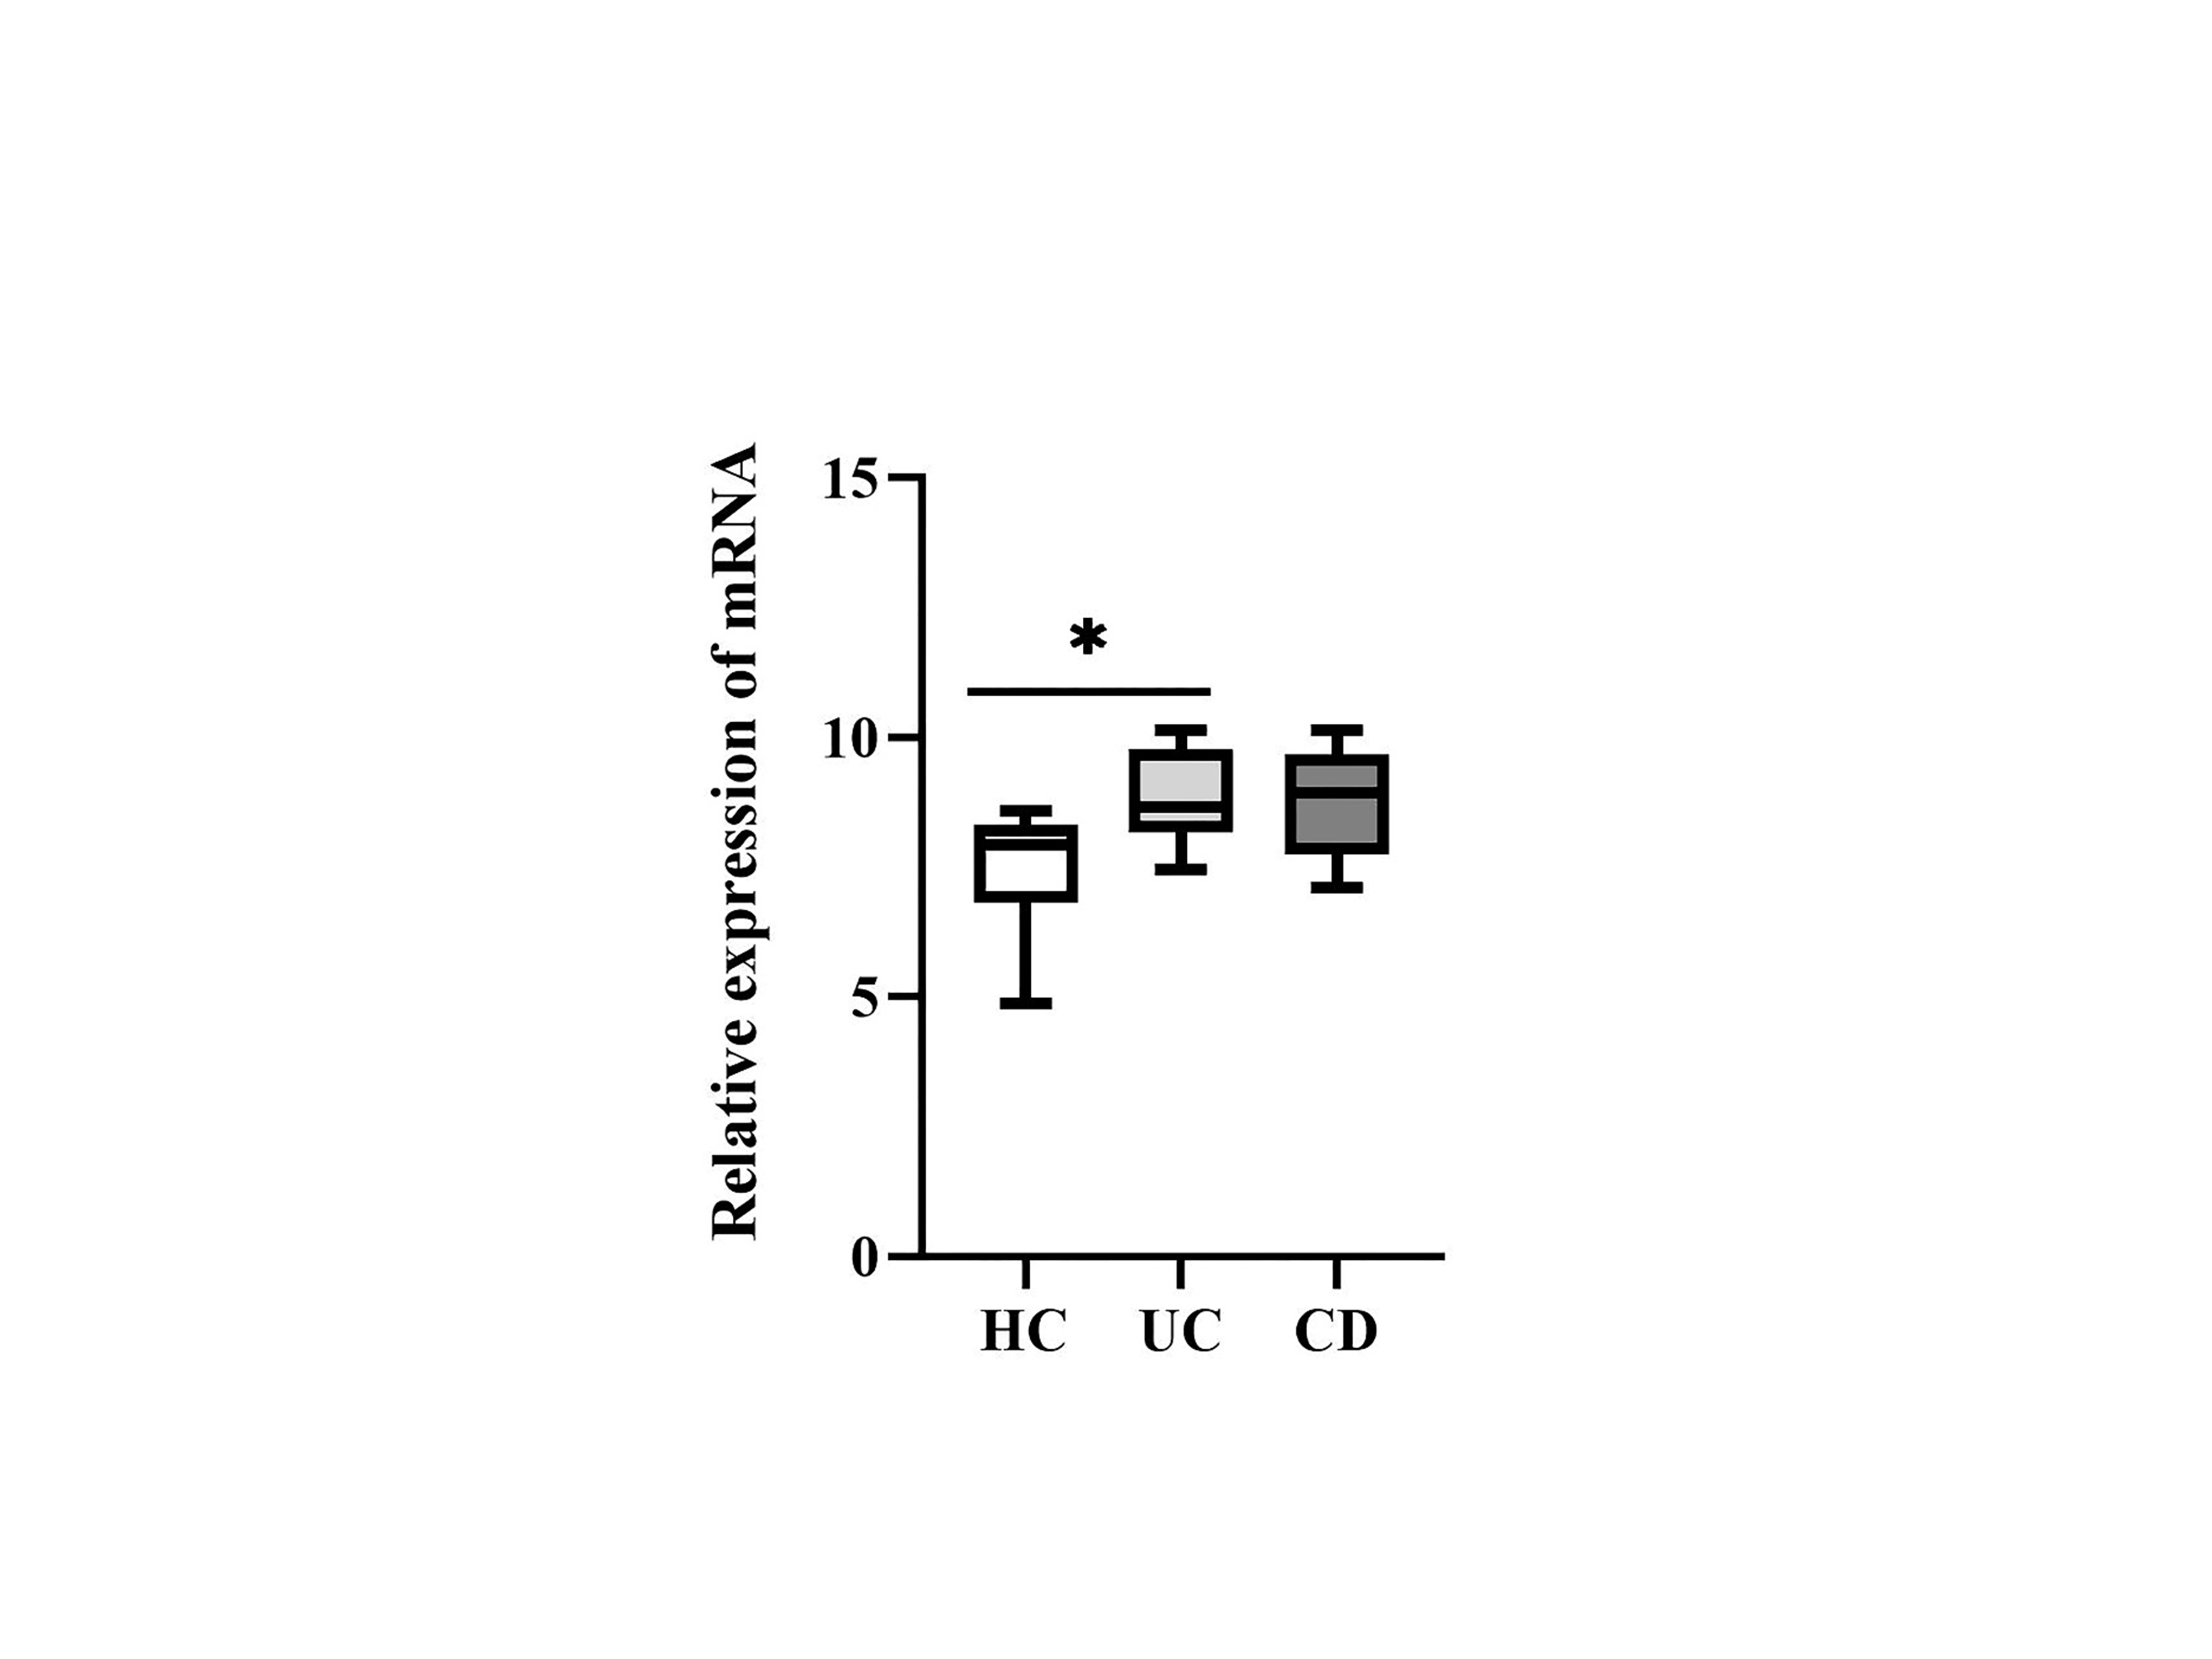


**Supplementary Figure 2** Boxplot of the expression of SYK in GEO dataset GSE123141 (**P* < 0.05).


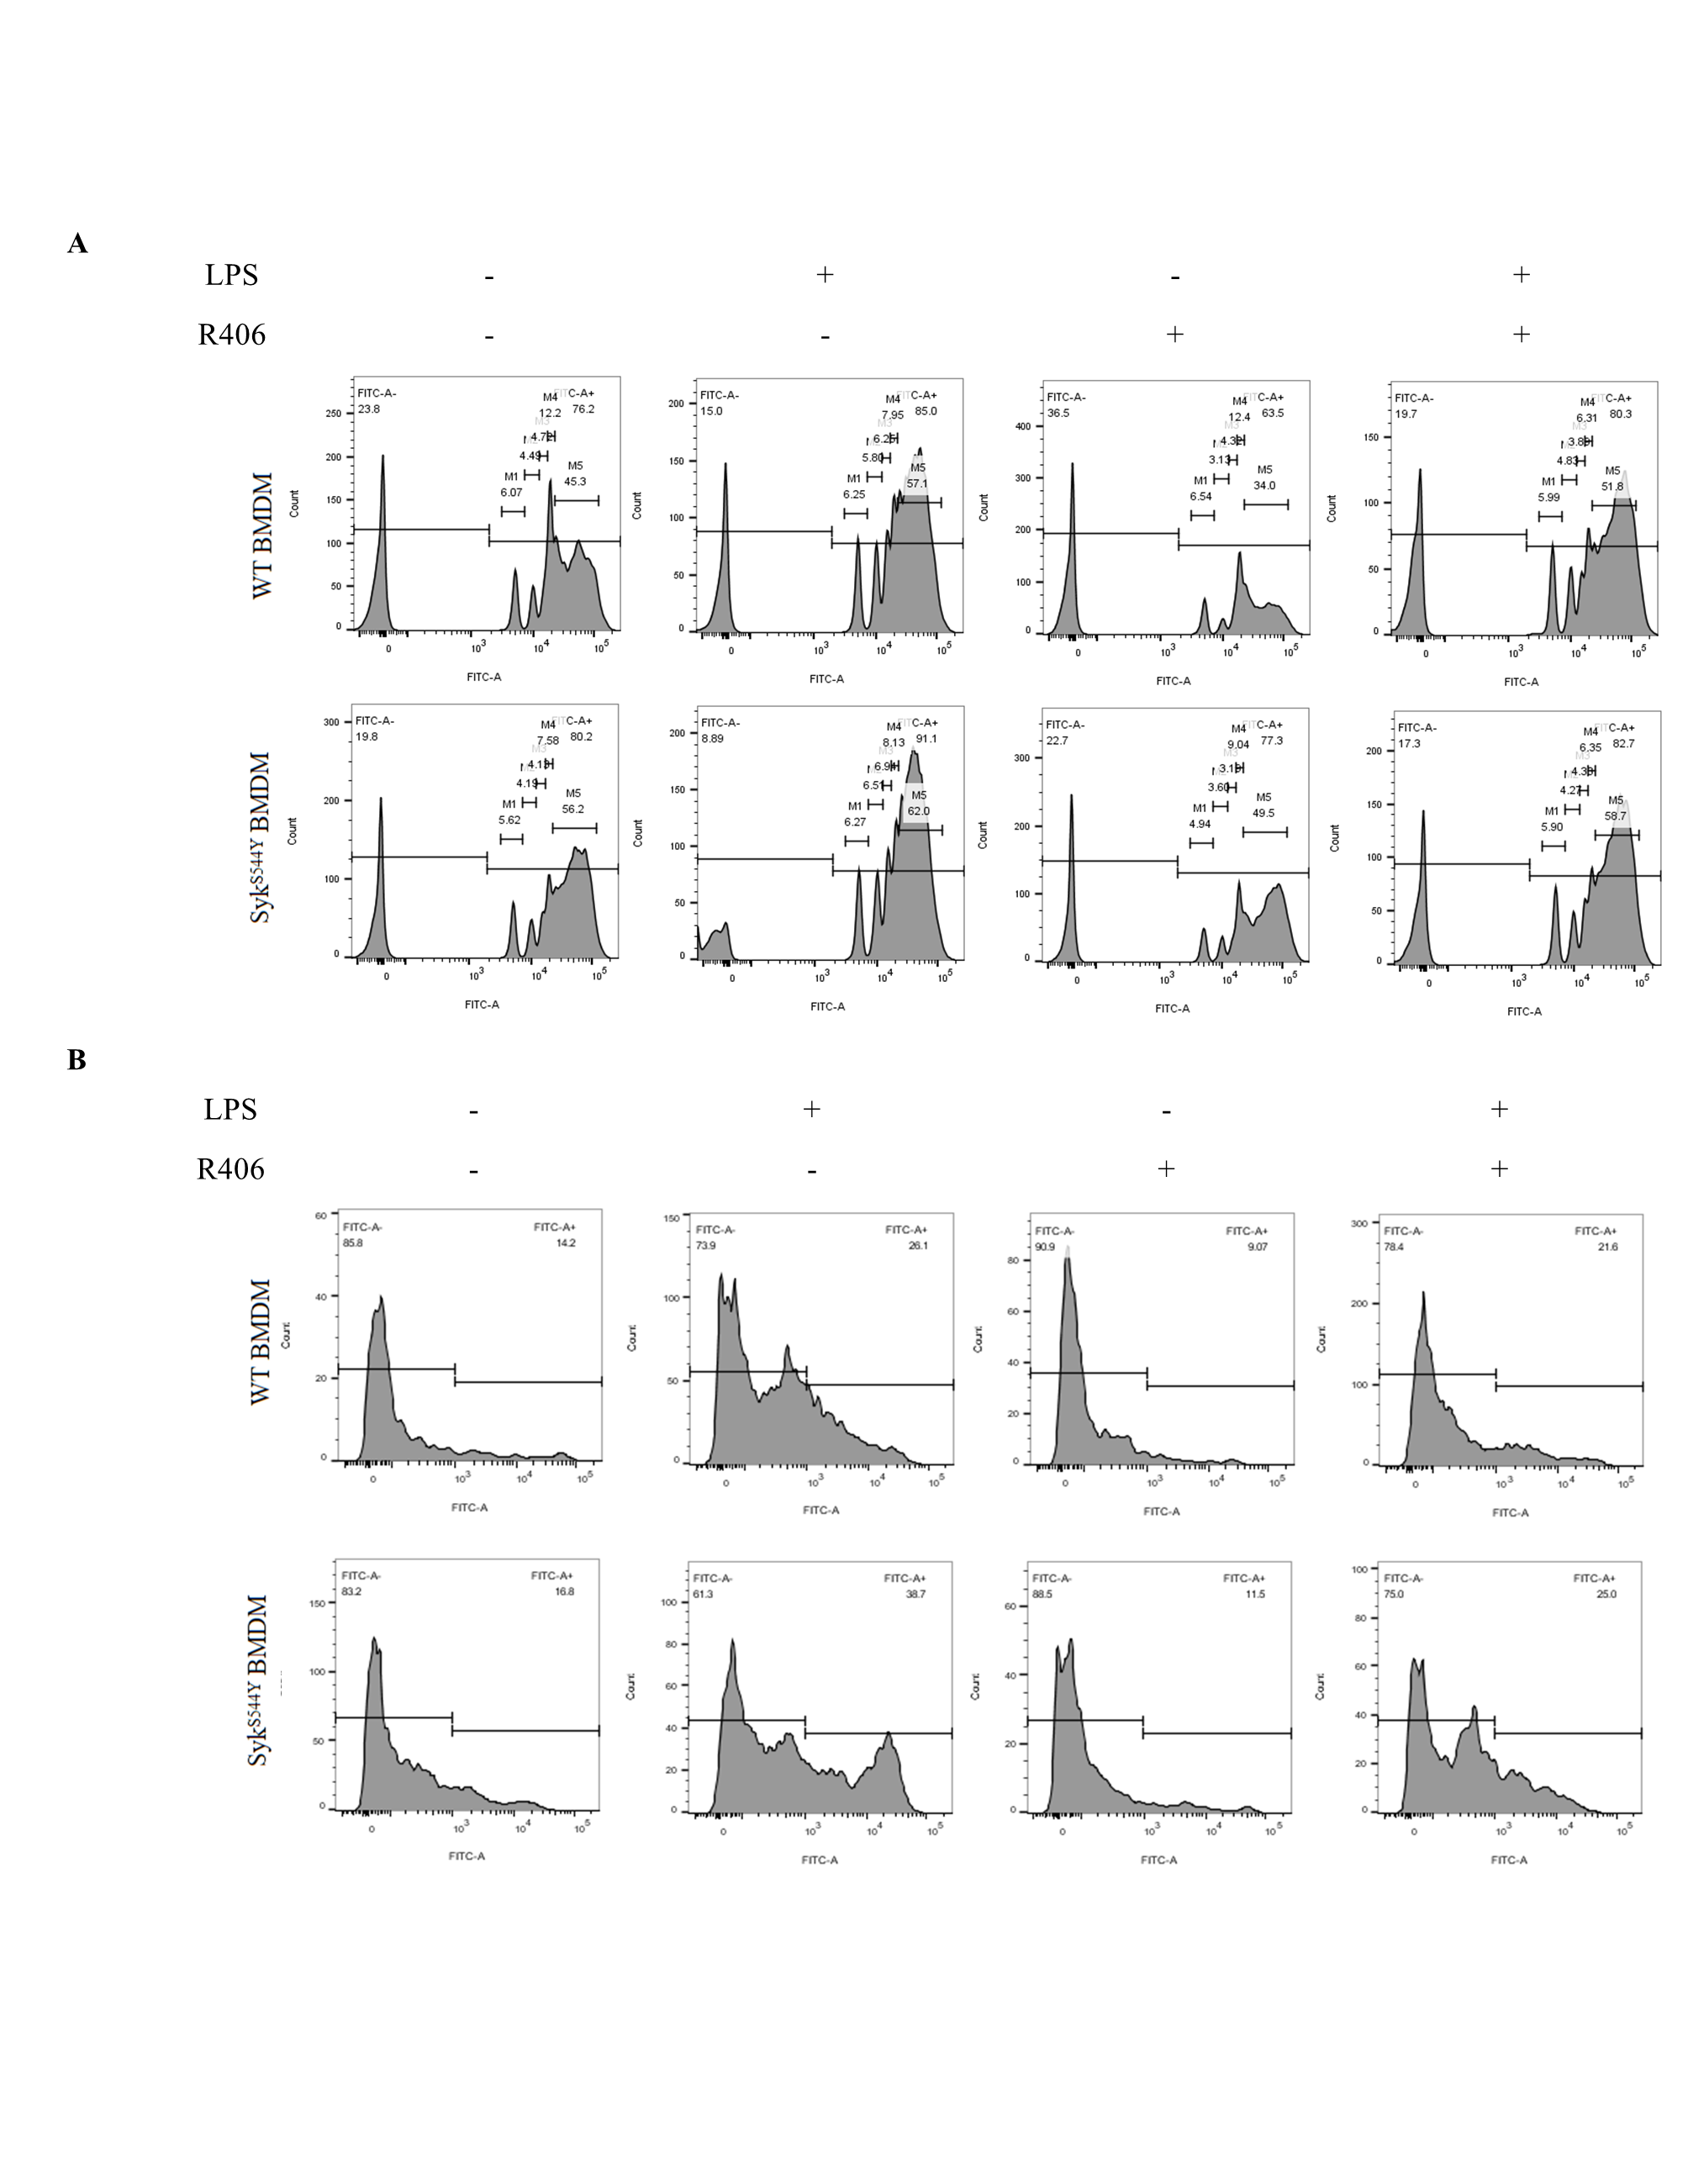


**Supplementary Figure 3** Representative images of the phagocytic ability and ROS production in BMDM. WT and SykS544Y BMDM (8×105 ) were treated with or without 200 ng/mL LPS overnight for phagocytosis or treated for 3h for ROS detection in the presence or absence of 2 uM R406 . (A) Phagocytosis of BMDM to Fluorescent microspheres detected by flow cytometry (n=4/group). (B) ROS labeled with DCFH-DA in BMDM detected by flow cytometry (n=4/group). ROS, reactive oxygen species; BMDM, bone marrow-derived macrophages; LPS, Lipopolysaccharides; DCFH-DA, 2, 7-dichloride-hydro fluorescein diacetate.
